# Supplementary material for: A nanosheet-like BiPO4/Bi2O2CO3 heterostructured photocatalyst with enhanced photocatalytic activity
Source: Royal Society of Chemistry journal article supplement (doi:10.1039/c5ra16146k), 2015-01-01
Supplement: c5ra16146k1.pdf [file c5ra16146k1.pdf]

## Supplementary Information

### **Nanosheet-like BiPO<sub>4</sub>/Bi<sub>2</sub>O<sub>2</sub>CO<sub>3</sub> heterostructured photocatalyst with enhanced photocatalytic activity**

Yumin Liu,<sup>\*ab</sup> Peng Zhang,<sup>ab</sup> Hua Lv,<sup>ab</sup> Jing Guang,<sup>ab</sup> Shuang Li<sup>ab</sup> and Juhui Jiang<sup>ab</sup>

<sup>a</sup>Collaborative Innovation Center of Henan Province for Green Manufacturing of Fine Chemicals, Key Laboratory of Green Chemical Media and Reactions, Ministry of Education, Henan Normal University, Xinxiang, Henan 453007, P. R. China

<sup>b</sup>Henan Key Laboratory of Green Chemical Media and Reactions, School of Chemistry and Chemical Engineering, Henan Normal University, Xinxiang, Henan 453007, P. R. China

\* To whom correspondence should be addressed. Tel: +86 373 3326335; Fax: +86 373 3326336.

E-mail addresses: ymliu2007@163.com (Y Liu).

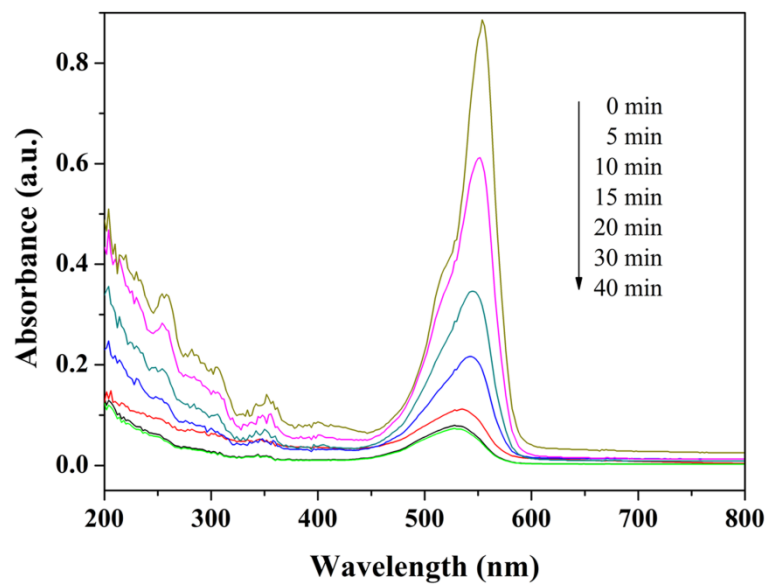

**Fig. S1.** Temporal UV–vis absorption spectral changes of RhB solution during the photodegradation process over 3% BiPO<sub>4</sub>/Bi<sub>2</sub>O<sub>2</sub>CO<sub>3</sub>.

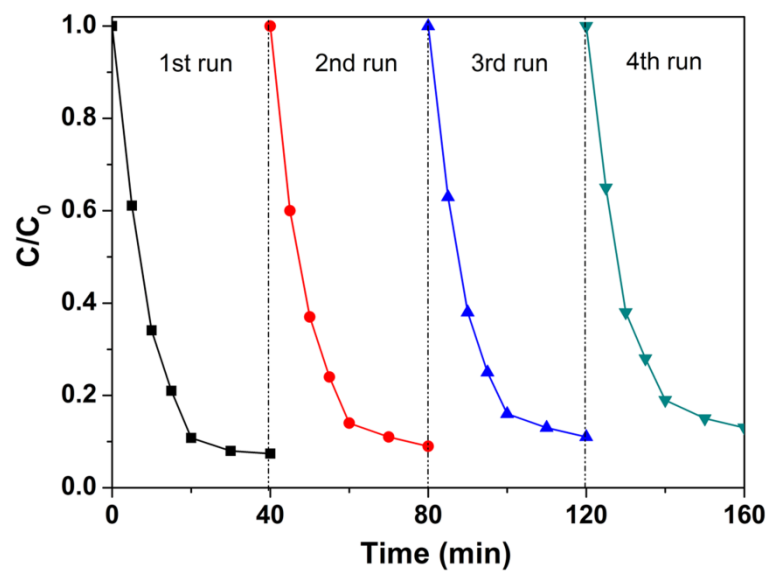

**Fig. S2.** Cycling runs of RhB degradation over 3%  $\text{BiPO}_4/\text{Bi}_2\text{O}_2\text{CO}_3$ .

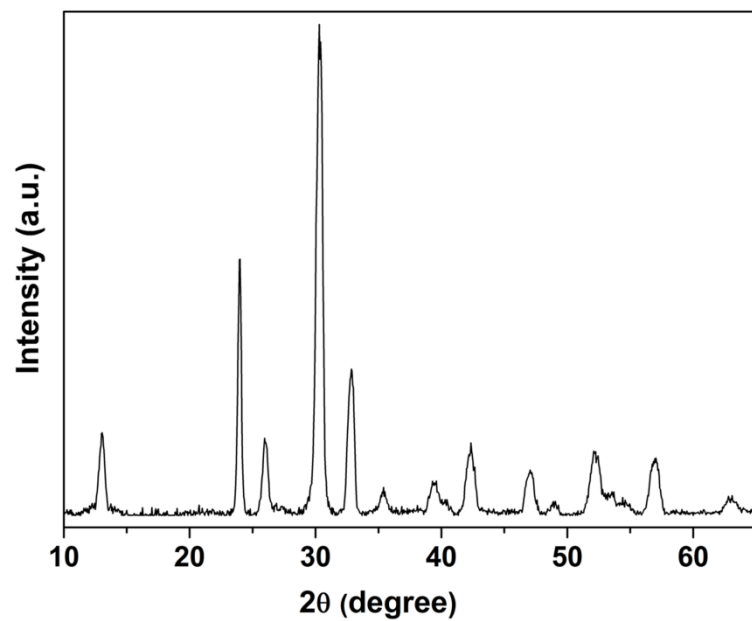

**Fig. S3.** XRD pattern of 3% BiPO<sub>4</sub>/Bi<sub>2</sub>O<sub>2</sub>CO<sub>3</sub> after four cycling runs.

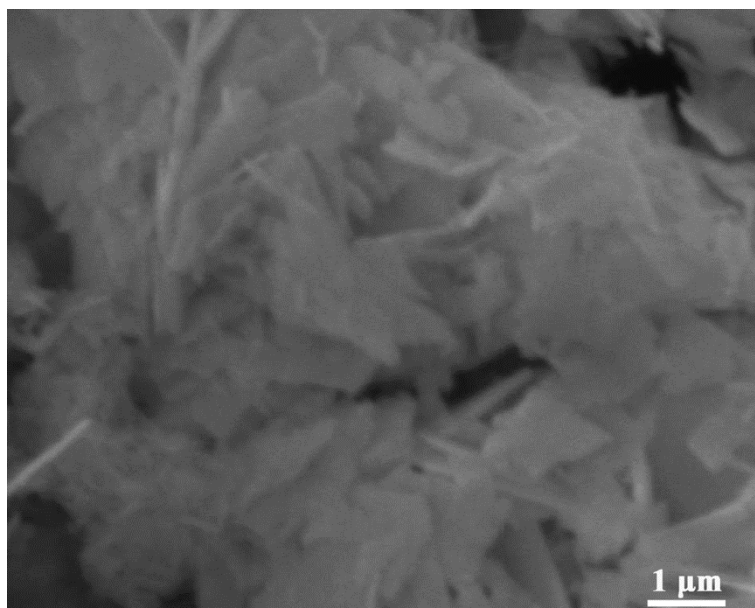

**Fig. S4.** SEM image of 3% BiPO<sub>4</sub>/Bi<sub>2</sub>O<sub>2</sub>CO<sub>3</sub> after four cycling runs.
